# Supplementary material for: Paper reinforced with regenerated cellulose: a sustainable and fascinating material with good mechanical performance, barrier properties and shape retention in water
Source: Royal Society of Chemistry journal article supplement (doi:10.1039/c6ta07681e), 2016-01-01
Supplement: c6ta07681e5.pdf [file c6ta07681e5.pdf]

## Supporting Information

**Paper reinforced with regenerated cellulose: Sustainable and fascinating material with good mechanical performance, barrier property and shape-retaining in water**

Weihua Zhang,<sup>a,b</sup> Zhijiao Jing,<sup>a</sup> Youna Shan,<sup>a</sup> Xuesong Ge,<sup>a</sup> Xindong Mu,<sup>a</sup> Yijun Jiang,<sup>a\*</sup> Hui Li<sup>a</sup> and Pingwei Wu<sup>b\*</sup>

<sup>a</sup> Key Laboratory of Bio-based Materials, Qingdao Institute of Bioenergy and Bioprocess Technology, Chinese Academy of Sciences, Qingdao, 266101, China. \*E-mail: jiangyj@qibebt.ac.cn

<sup>b</sup> Institute of Materials Science and Engineering, Ocean University of China, Qingdao 266100, China.

\*E-mail: wupingwei@ouc.edu.cn

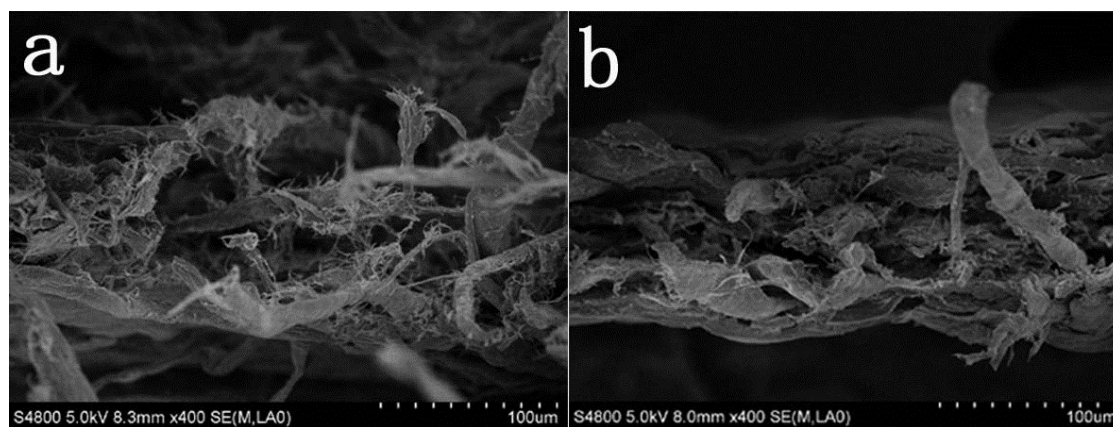

**Figure S1.** SEM images of the cross sections of the (a) origin paper, (b) RCP-4.

| Sample | Toughness<br>MJ/m <sup>3</sup> | Tensile strength<br>(M Pa) | Elastic modulus<br>(wt%) | Elongation at break |
|--------|--------------------------------|----------------------------|--------------------------|---------------------|
| RCP-0  | 0.3±0.05                       | 20±3                       | 700±300                  | 3±1                 |
| RCP-1  | 1.8±0.2                        | 27±4                       | 900±250                  | 9±1                 |
| RCP-2  | 7±0.15                         | 50±7                       | 1000±300                 | 18±3                |
| RCP-3  | 5±0.3                          | 60±8                       | 1300±200                 | 11±2                |
| RCP-4  | 6.5±0.2                        | 75±5                       | 1900±100                 | 10±2                |

**Table S1.** Mechanical properties of composite paper at 50 RH.

| Sample | Toughness<br>MJ/m <sup>3</sup> | Tensile strength<br>(MPa) | Elastic modulus<br>(MPa) | Elongation at break<br>(wt%) |
|--------|--------------------------------|---------------------------|--------------------------|------------------------------|
| RCP-0  | 0.028±0.02                     | 1±0.2                     | 24±10                    | 3±1                          |
| RCP-1  | 0.19±0.01                      | 4±2                       | 50±8                     | 9±1                          |
| RCP-2  | 0.94±0.02                      | 10±1                      | 100±20                   | 13±2                         |
| RCP-3  | 0.75±0.03                      | 12±1                      | 100±10                   | 10±2                         |
| RCP-4  | 0.75±0.02                      | 13±1                      | 110±15                   | 10±2                         |

**Table S2.** Wet strength of the composite paper.

| Sampl | RC        | Tensile strength | Elastic modulus | Elongation at break |
|-------|-----------|------------------|-----------------|---------------------|
|       | Conten(%) | (MPa)            | (MPa)           | (wt%)               |
| RP-0  | 0         | 20±3             | 700±300         | 3±1                 |
| RP-1  | 2.21      | 23±1             | 700±50          | 10±1                |
| RP-2  | 9.38      | 39±1             | 800±100         | 14±3                |
| RP-3  | 15.32     | 47±2             | 1400±80         | 15±1                |
| RP-4  | 19.86     | 54±3             | 1700±100        | 12±2                |

**Table S3.** Mechanical properties of composite paper at 50 RH.

| Sample | RC         | Tensile strength | Elastic modulus | Elongation at break |
|--------|------------|------------------|-----------------|---------------------|
|        | content(%) | (MPa)            | (MPa)           | (wt%)               |
| RP-0   | 0          | 1±0.2            | 24±10           | 3±1                 |
| RP-1   | 2.21       | 6±1              | 60±10           | 9±1                 |
| RP-2   | 9.38       | 8±1              | 90±10           | 11±3                |
| RP-3   | 15.32      | 10±1             | 100±10          | 10±1                |
| RP-4   | 19.86      | 11±1             | 110±10          | 10±2                |

**Table S4.** Wet strength of the composite paper without ECH.

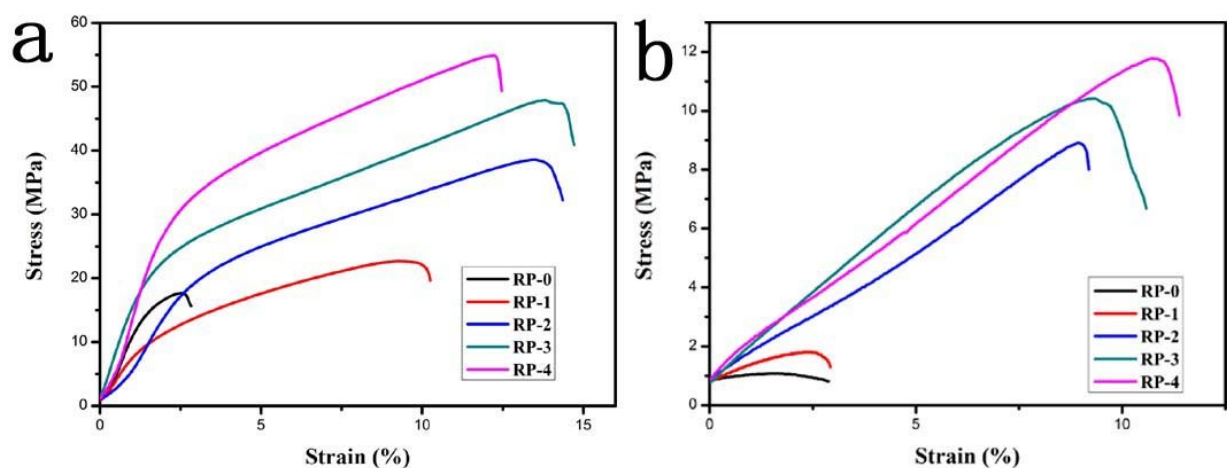

**Figure S2.** a) Stress–strain curves of origin paper and cross-linked paper without ECH at 50 RH. b) Stress–strain curves of origin paper and cross-linked paper without ECH under wet conditions.

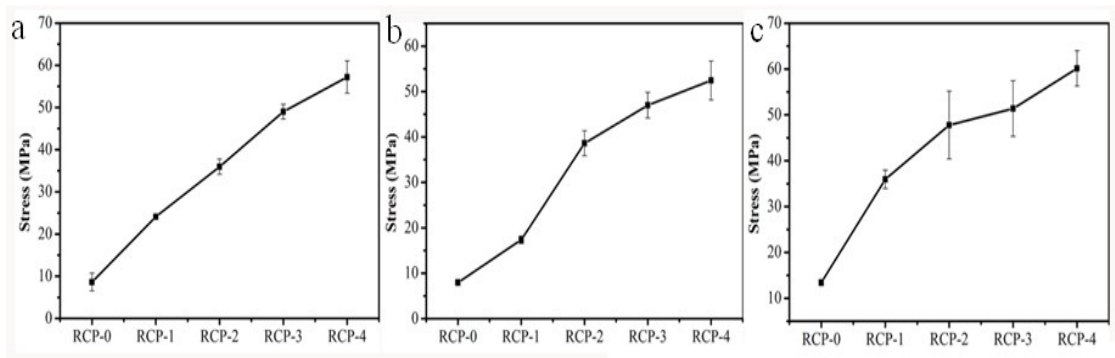

**Figure S3.** a) Stress-strain curves of regenerated cellulose cross-linked paper treated with 8 M  $H_2SO_4$ , 10 M NaOH and saturated NaCl for 10 min, respectively.

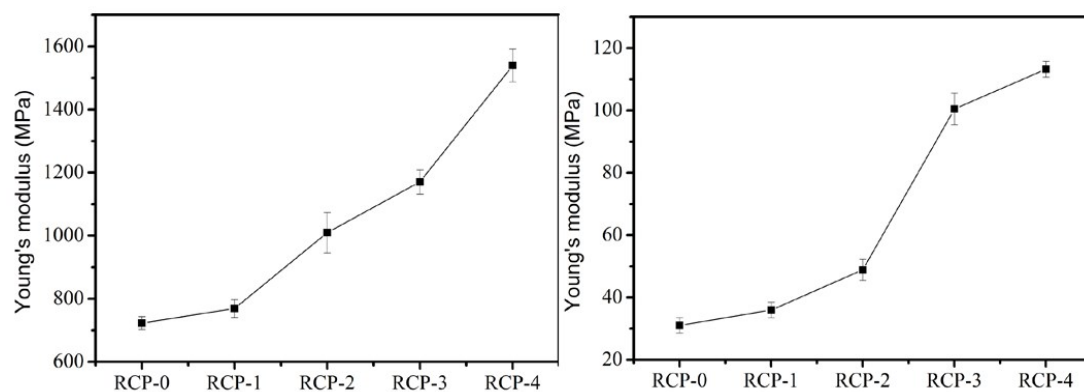

**Figure S4.** a) Young's modulus of the dry samples. b) Young's modulus of the wet samples.

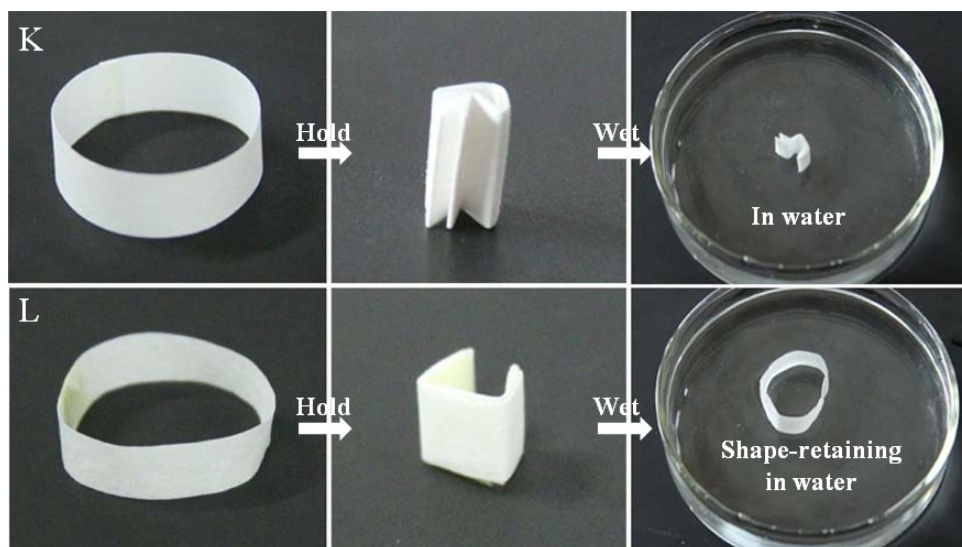

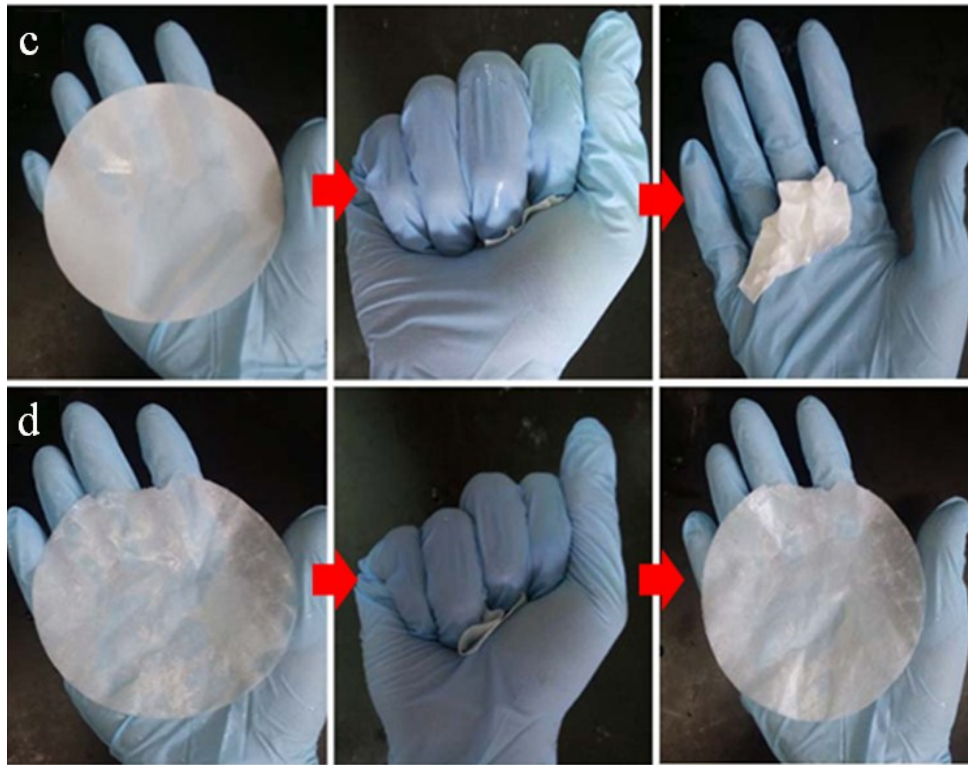

**Figure S5** a) Shape deformation of folded RCP-0 when immersed in water. b) Shape-retaining of folded RCP-4 when immersed in water. c) Shape deformation of wet paper(RCP-0). d) Shape-retaining of wet RCP-4.
